# Supplementary material
Source: PubMed Central journal article supplement (PMC4299239)
Supplement: pnas.201423011SI.pdf [file pnas.201423011SI.pdf]

# Supporting Information

Leavenworth et al. 10.1073/pnas.1423011112

## SI Materials and Methods

**NK Cell Stimulation and Flow Cytometry.** Splenocytes were stimulated with plate-bound anti-NK1.1 or anti-NKp46 or PMA/ionomycin for 5–6 h or incubated with IL-15 for 24 h before analysis of CD107a for NK cell degranulation or intracellular staining of IFN $\gamma$ , granzyme B, and perforin. Surface and intracellular staining were performed as previously described (1). The following antibodies were used: NK1.1, CD3, TCR $\beta$ , CD45.1, CD45.2, Ly49H, Ly49D, Ly49F, Ly49G2, Ly49A, Ly49CI, NKG2A, KLRG1, NKp46, NKG2D, CD122, CD11b, CD43, CD27, B220, CD61, CD51, CD44, annexin V, Ki67, CD107a, IFN $\gamma$ , granzyme B, perforin, T-bet, Eomes, and phospho-mTOR (p-mTOR) (Ser2448) (eBioscience, BD, or Cell Signaling). Cells were acquired on a BD FACSAria using FACSDiva software (BD Biosciences) and analyzed with FlowJo software (Tristar).

**Adoptive Transfer, Lentiviral Transduction, and MCMV Infection.** Sorted NK1.1<sup>+</sup> CD3<sup>-</sup> NK cells (>98%) were injected into *Rag2*<sup>-/-</sup> $\gamma$ C<sup>-/-</sup> mice intravenously. CFSE labeling of cells was performed according to the manufacturer's instructions (Invitrogen). In Fig. 4D,  $5 \times 10^4$  pfu of a salivary gland stock of MCMV (Smith strain) was injected intraperitoneally. For in vivo reconstitution of OPN-i expression, in vitro cultured HSCs (Lin<sup>-</sup>Scal1<sup>+</sup>cKit<sup>+</sup>) were infected with the indicated GFP-expressing lentiviral vectors for 2 d before i.v. injection of sorted GFP<sup>+</sup> cells into sublethally irradiated

(550 rads) *Rag2*<sup>-/-</sup> $\gamma$ C<sup>-/-</sup> hosts. Viral particles were propagated by infection of 293T cells followed by concentration and titering for optimal multiplicity of infection in the infection assays that follow.

**In Vitro and in Vivo Cytotoxicity Assays.** In vitro cytotoxic assays were performed as previously described (1, 2). Following administration of sorted NK cells ( $2.5 \times 10^5$ ), *Rag2*<sup>-/-</sup> $\gamma$ C<sup>-/-</sup> mice were injected i.v. with ( $5 \times 10^4$ ) B16F10 melanoma cells on day 10 before enumeration of lung metastasis nodules on day 25, as described previously (3).

**Analysis of *Spp1* mRNA and OPN Protein Expression.** Quantitative real-time PCR was performed and analyzed as described (4) with the TaqMan gene expression assays [*Spp1* (Mm00436767\_m1) and *Rps18* (Mm02601777\_g1)]. Western analysis of OPN and actin protein levels was performed as described previously (5). Band intensity was quantified using ImageJ software, version 1.45b (National Institutes of Health).

**Microarray.** Splenic NK cells were sort purified (>95%) 10 d posttransfer into *Rag2*<sup>-/-</sup> $\gamma$ C<sup>-/-</sup> mice. RNA was prepared using RNeasy Plus Micro kit (Qiagen) before amplifying, labeling, and hybridizing to MOA430 2.0 chips (Affymetrix) at the Dana-Farber Cancer Institute Microarray Core Facility.

1. Leavenworth JW, et al. (2010) Analysis of the cellular mechanism underlying inhibition of EAE after treatment with anti-NKG2A F(ab')<sub>2</sub>. *Proc Natl Acad Sci USA* 107(6): 2562–2567.
2. Leavenworth JW, Wang X, Wenander CS, Spee P, Cantor H (2011) Mobilization of natural killer cells inhibits development of collagen-induced arthritis. *Proc Natl Acad Sci USA* 108(35):14584–14589.
3. Werneck MB, Lugo-Villarino G, Hwang ES, Cantor H, Glimcher LH (2008) T-bet plays a key role in NK-mediated control of melanoma metastatic disease. *J Immunol* 180(12): 8004–8010.
4. Leavenworth JW, Verbinnen B, Yin J, Huang H, Cantor H (2015) A p85 $\alpha$ -osteopontin axis couples the receptor ICOS to sustained Bcl-6 expression by follicular helper and regulatory T cells. *Nat Immunol* 16:96–106.
5. Shinohara ML, et al. (2006) Osteopontin expression is essential for interferon-alpha production by plasmacytoid dendritic cells. *Nat Immunol* 7(5):498–506.

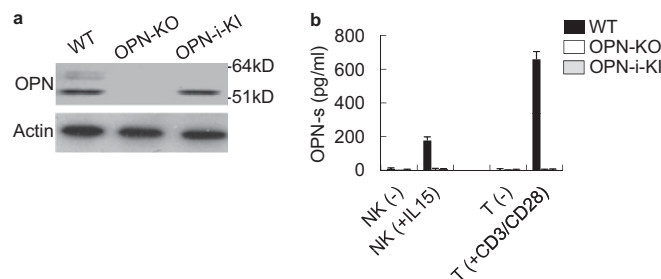

**Fig. S1.** Analysis of OPN protein expression in OPN-i-KI cells. (A) Purified NK cells from the indicated mouse strains were cultured with IL-15 (100 ng/mL) for 24 h. Western analysis of OPN and actin expression is shown. (B) Secreted OPN protein measured by ELISA from supernatants of purified NK and T cells from each mouse strain after stimulation with (+) or without (-) indicated reagents for 24 h.
